# Supplementary material
Source: PubMed Central journal article supplement (PMC6551769)
Supplement: ASN.2018111150SupplementaryData1.pdf [file ASN.2018111150SupplementaryData1.pdf]

A Table of Contents

**Supplementary Table 1.** Reasons for dropout from the study

**Supplementary Table 2.** Baseline characteristics among patients who completed the study

**Supplementary Table 3.** Change in laboratory data in the AST-120 arm

**Supplementary Table 4.** Change in laboratory data, medications, and blood pressure levels during the study period

**Supplementary Table 5.** Change in CAC scores in the AST-120 arm

**Supplementary Table 6.** Clinical Events in the AST-120 arm

Supplementary Table 1. Reasons for dropout from the study

| 1) Magnesium oxide arm | Magnesium oxide (n=63)           | Control (n=60)                   |
|------------------------|----------------------------------|----------------------------------|
|                        | 1 death                          | 2 deaths                         |
|                        | 2 lost to follow up              | 4 withdrew consent               |
|                        | 4 withdrew consent               | 2 transferred to other hospitals |
|                        | 4 transferred to other hospitals | 1 coronary artery stenting       |
|                        | 3 diarrhea                       | 1 deteriorated ADL               |
|                        | 1 coronary artery stenting       |                                  |
|                        | 2 deteriorated ADL               |                                  |
| Total                  | 17 (27%)                         | 10 (17%)                         |

  

| 2) AST-120 arm | AST-120 (n=70)                   | Control (n=53)                   |
|----------------|----------------------------------|----------------------------------|
|                | 2 lost to follow up              | 3 deaths                         |
|                | 9 withdrew consent               | 2 withdrew consent               |
|                | 3 transferred to other hospitals | 3 transferred to other hospitals |
|                | 1 deteriorated ADL               | 2 coronary artery stenting       |
|                |                                  | 2 deteriorated ADL               |
| Total          | 15 (21%)                         | 12 (23%)                         |

Abbreviations: ADL, activities of daily living

Supplementary Table 2. Baseline characteristics among patients who completed the study

|                                 | Magnesium oxide arm     |                 |         | AST-120 arm     |                 |         |
|---------------------------------|-------------------------|-----------------|---------|-----------------|-----------------|---------|
|                                 | Magnesium oxide<br>n=46 | Control<br>n=50 | P-value | AST-120<br>n=55 | Control<br>n=41 | P-value |
| age, year                       | 71 (11)                 | 69 (11)         | 0.26    | 70 (11)         | 69 (13)         | 0.72    |
| female, %                       | 26                      | 20              | 0.48    | 16              | 32              | 0.08    |
| body mass index                 | 23.8 (3.8)              | 24.4 (4.3)      | 0.45    | 23.8 (4.0)      | 24.6 (4.1)      | 0.34    |
| diabetes mellitus, %            | 74                      | 70              | 0.67    | 73              | 71              | 0.83    |
| past history of CVD, %          | 48                      | 48              | 0.99    | 49              | 46              | 0.79    |
| past history of CHF, %          | 15                      | 24              | 0.28    | 22              | 17              | 0.56    |
| current smokers, %              | 11                      | 12              | 0.86    | 15              | 7               | 0.27    |
| systolic BP, mmHg               | 126 (17)                | 133 (20)        | 0.06    | 132 (19)        | 127 (18)        | 0.25    |
| diastolic BP, mmHg              | 69 (14)                 | 74 (11)         | 0.07    | 72 (13)         | 71 (11)         | 0.67    |
| serum creatinine, mg/dL         | 1.61 (0.58)             | 1.67 (0.58)     | 0.64    | 1.72 (0.59)     | 1.52 (0.54)     | 0.08    |
| eGFR, mL/min/1.73m <sup>2</sup> | 36 (13)                 | 36 (13)         | 0.89    | 35 (13)         | 37 (12)         | 0.28    |
| serum calcium, mg/dL            | 9.3 (0.4)               | 9.2 (0.4)       | 0.15    | 9.2 (0.4)       | 9.3 (0.4)       | 0.61    |
| serum phosphate, mg/dL          | 3.5 (0.6)               | 3.4 (0.5)       | 0.64    | 3.4 (0.6)       | 3.4 (0.5)       | 0.85    |
| serum magnesium, mg/dL          | 2.0 (0.2)               | 2.1 (0.3)       | 0.33    | 2.1 (0.2)       | 2.0 (0.3)       | 0.33    |
| whole PTH, pg/mL                | 44 [33, 64]             | 47 [30, 67]     | 0.57    | 46 [27, 66]     | 43 [35, 64]     | 0.76    |
| serum albumin, g/dL             | 3.9 (0.4)               | 4.0 (0.5)       | 0.29    | 3.9 (0.4)       | 4.1 (0.5)       | 0.20    |
| LDL-cholesterol, mg/dL          | 106 (33)                | 100 (29)        | 0.36    | 102 (34)        | 104 (26)        | 0.72    |
| CAC score                       | 302 [64, 924]           | 166 [54, 606]   | 0.44    | 150 [64, 747]   | 203 [63, 903]   | 0.89    |

Data are based on the full-analysis set population.

Continuous variables are presented as mean (standard deviation) or median [p25, p75].

Abbreviations: CVD, cardiovascular disease; CHF, congestive heart failure; BP, blood pressure; eGFR, estimated glomerular filtration rate; PTH, parathyroid hormone; LDL, low-density lipoprotein; CAC, coronary artery calcification

Supplementary Table 3. Change in laboratory data in the AST-120 arm

| parameter                            | allocation group | baseline    | 1 year      | 2 year      | P-value |
|--------------------------------------|------------------|-------------|-------------|-------------|---------|
| serum magnesium, mg/dL               | Control          | 2.0 (0.3)   | 2.1 (0.3)   | 2.1 (0.3)   | 0.65    |
|                                      | AST-120          | 2.1 (0.2)   | 2.2 (0.3)   | 2.2 (0.4)   |         |
| serum calcium, mg/dL                 | Control          | 9.3 (0.4)   | 9.2 (0.4)   | 9.3 (0.4)   | 0.83    |
|                                      | AST-120          | 9.2 (0.4)   | 9.1 (0.4)   | 9.2 (0.5)   |         |
| serum phosphate, mg/dL               | Control          | 3.4 (0.5)   | 3.4 (0.6)   | 3.5 (0.6)   | 0.62    |
|                                      | AST-120          | 3.4 (0.6)   | 3.6 (0.8)   | 3.6 (0.7)   |         |
| Fractional excretion of phosphate, % | Control          | 19.8 (10.3) | 20.4 (10.1) | 21.6 (10.2) | 0.83    |
|                                      | AST-120          | 23.3 (12.2) | 23.5 (12.5) | 25.6 (13.7) |         |
| plasma whole PTH, pg/mL              | Control          | 43 [35, 64] | 47 [35, 66] | 46 [32, 72] | 0.32    |
|                                      | AST-120          | 46 [27, 66] | 43 [31, 98] | 48 [29, 82] |         |
| eGFR, mL/min/1.73m <sup>2</sup>      | Control          | 37.4 (12.3) | 34.6 (12.4) | 34.2 (13.1) | 0.54    |
|                                      | AST-120          | 34.5 (13.0) | 31.5 (15.1) | 30.5 (15.1) |         |

Data are based on the full-analysis set population and presented as mean (standard deviation) or median [q1, q3].

Differences between allocation groups are tested using a repeated measured analysis of variance.

Abbreviations: PTH, parathyroid hormone; eGFR, estimated glomerular filtration rate

Supplementary Table 4. Change in laboratory data, medications, and blood pressure levels during the study period

| Parameters                  | Allocation group | n  | Baseline   | End of the study | P-value |
|-----------------------------|------------------|----|------------|------------------|---------|
| LDL-cholesterol, mg/dL      | Control          | 50 | 100 (29)   | 95 (30)          | 0.82    |
|                             | Magnesium oxide  | 46 | 106 (33)   | 100 (32)         |         |
|                             | Control          | 41 | 104 (26)   | 102 (35)         | 0.46    |
|                             | AST-120          | 55 | 102 (34)   | 94 (28)          |         |
| HbA1c, %                    | Control          | 35 | 6.9 (1.2)  | 6.8 (1.0)        | 0.73    |
|                             | Magnesium oxide  | 34 | 7.0 (0.9)  | 6.9 (1.0)        |         |
|                             | Control          | 29 | 6.9 (0.9)  | 6.9 (1.1)        | 0.91    |
|                             | AST-120          | 40 | 7.0 (1.2)  | 6.8 (1.0)        |         |
| Hb, g/dL                    | Control          | 50 | 12.6 (1.6) | 12.4 (1.9)       | 0.95    |
|                             | Magnesium oxide  | 46 | 12.5 (1.7) | 12.3 (2.0)       |         |
|                             | Control          | 41 | 12.7 (1.6) | 12.7 (1.9)       | 0.27    |
|                             | AST-120          | 55 | 12.5 (1.6) | 12.2 (1.9)       |         |
| Statins, n (%)              | Control          | 50 | 24 (48)    | 25 (50)          | 0.67    |
|                             | Magnesium oxide  | 46 | 27 (59)    | 25 (54)          |         |
|                             | Control          | 41 | 24 (59)    | 23 (56)          | 0.50    |
|                             | AST-120          | 55 | 27 (49)    | 27 (49)          |         |
| Anti-platelet agents, n (%) | Control          | 50 | 19 (38)    | 17 (34)          | 0.89    |
|                             | Magnesium oxide  | 46 | 16 (35)    | 15 (33)          |         |
|                             | Control          | 41 | 15 (37)    | 15 (37)          | 0.56    |
|                             | AST-120          | 55 | 20 (36)    | 17 (31)          |         |

|                    |                 |    |          |          |      |
|--------------------|-----------------|----|----------|----------|------|
| Systolic BP, mmHg  | Control         | 50 | 133 (20) | 132 (18) | 0.19 |
|                    | Magnesium oxide | 46 | 126 (17) | 132 (16) |      |
|                    | Control         | 41 | 127 (18) | 130 (17) | 0.67 |
|                    | AST-120         | 55 | 132 (19) | 133 (18) |      |
| Diastolic BP, mmHg | Control         | 50 | 74 (11)  | 75 (12)  | 0.65 |
|                    | Magnesium oxide | 46 | 69 (14)  | 72 (12)  |      |
|                    | Control         | 41 | 71 (11)  | 72 (13)  | 0.60 |
|                    | AST-120         | 55 | 72 (13)  | 74 (11)  |      |

Data are based on the full-analysis set population except for HbA1c in which only patients with diabetes mellitus were included.

Data are presented as mean (standard deviation) or number (percent).

Differences between allocation groups are tested using a repeated measured analysis of variance for continuous variables or chi-square test for categorical variables.

Abbreviations: LDL, low-density lipoprotein; Hb, hemoglobin; BP, blood pressure.

Supplementary Table 5. Change in CAC scores in the AST-120 arm

|                                                   | Allocation group | n  | CAC score       |                  | Percent change in CAC scores | P-value |
|---------------------------------------------------|------------------|----|-----------------|------------------|------------------------------|---------|
|                                                   |                  |    | Baseline        | End of the study |                              |         |
| Total                                             | Control          | 41 | 203 [63, 903]   | 293 [93, 1033]   | 31.9 [8.0, 65.6]             | 0.57    |
|                                                   | AST-120          | 55 | 150 [64, 747]   | 279 [85, 885]    | 23.1 [2.4, 60.1]             |         |
| Baseline eGFR $\geq$ 30 mL/min/1.73m <sup>2</sup> | Control          | 28 | 151 [40, 788]   | 214 [44, 1032]   | 32.1 [13.1, 64.3]            | 0.90    |
|                                                   | AST-120          | 32 | 119 [47, 288]   | 164 [60, 429]    | 25.9 [6.1, 77.0]             |         |
| Baseline eGFR <30 mL/min/1.73m <sup>2</sup>       | Control          | 13 | 547 [164, 903]  | 567 [293, 1033]  | 11.8 [0, 78.2]               | 0.62    |
|                                                   | AST-120          | 23 | 582 [102, 1041] | 622 [187, 1560]  | 11.0 [0, 40.0]               |         |

Data are based on the full-analysis set population and presented as median [q1, q3].

Percent changes in CAC scores are compared between groups using the Wilcoxon rank-sum test.

Abbreviations: CAC, coronary artery calcification; eGFR, estimated glomerular filtration rate

The median CAC scores at baseline and at the end of the study are not necessarily from the same patient. Therefore, the percent change calculated from these 2 values does not correspond to the true median percent change in CAC scores in each study group.



Supplementary Table 6. Clinical events in the AST-120 arm

|                       | AST-120 (n = 70)                                                                                                                                           | Control (n = 53)                                                                                                     |
|-----------------------|------------------------------------------------------------------------------------------------------------------------------------------------------------|----------------------------------------------------------------------------------------------------------------------|
| Deaths                | 0                                                                                                                                                          | 3 (5.7%)<br>Acute myocardial infarction (n=1)<br>End-stage kidney disease (n=1)<br>Hepatitis B virus cirrhosis (n=1) |
| Cardiovascular events | 5 (7.1%)<br>Heart failure (n=1)<br>Atrioventricular block (n=1)<br>Infectious endocarditis (n=1)<br>Cerebral infarction (n=1)<br>Cerebral hemorrhage (n=1) | 3 (5.7%)<br>Heart failure (n=1)<br>Percutaneous coronary intervention (n=2)                                          |
| Initiation of RRT     | 6 (8.6%)                                                                                                                                                   | 0                                                                                                                    |
| Adverse Events        | 2 (2.9%)<br>Severe constipation (n=2)                                                                                                                      | 0<br>-                                                                                                               |

Data are based on all randomized patients.

Abbreviations: RRT, renal replacement therapy
